# Supplementary material
Source: ML conference proceedings conference paper supplement (https://proceedings.neurips.cc/paper_files/paper/2012/hash/3e313b9badf12632cdae5452d20e1af6-Abstract.html)
Supplement: Supplementary file 2 [file 3e313b9badf12632cdae5452d20e1af6-Supplemental.zip]

Archive with 1 entries (1 files):
- supplementary/Paper 1351/diffusionTracker_Supp.pdf
